# Supplementary material for: NaV3O8 nanosheet@polypyrrole core–shell composites with good electrochemical performance as cathodes for Na-ion batteries
Source: Royal Society of Chemistry journal article supplement (doi:10.1039/c5nr02064f), 2015-01-01
Supplement: c5nr02064f1.pdf [file c5nr02064f1.pdf]

Supporting Information for

## NaV<sub>3</sub>O<sub>8</sub> Nanosheets@Polypyrrole Core-Shell Composites with Good Electrochemical Performance as Cathode for Na-Ion Batteries

Hongyan Kang, Yongchang Liu, Minghui Shang, Tianyu Lu, Yijing Wang and Lifang Jiao\*

Institute of New Energy Material Chemistry, Collaborative Innovation Center of Chemical Science and Engineering (Tianjin), Key Laboratory of Advanced Energy Materials Chemistry (MOE), Tianjin Key Lab of Metal and Molecule-based Material Chemistry, Nankai University, Tianjin 300071, PR China

### Supplementary Figures

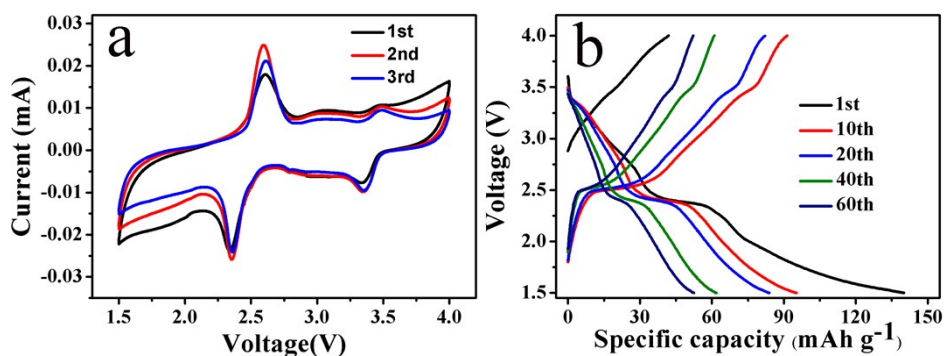

Fig. S1 (a) CV curves of the bare NaV<sub>3</sub>O<sub>8</sub> electrode for the first 3 cycles at a scan rate of 0.1 mV s<sup>-1</sup> between 1.5 V and 4.0 V (b) Charge/discharge profiles of the selected cycles for NaV<sub>3</sub>O<sub>8</sub> at 80 mA g<sup>-1</sup>

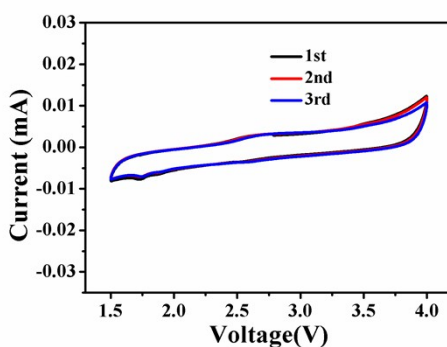

Fig. S2 CV curves of the pure PPy electrode for the first 3 cycles at a scan rate of 0.1 mV s<sup>-1</sup> between 1.5 V and 4.0 V.

The CV curves of pure PPy shows no sharp peaks except for a pair of little peaks located at 2.65 V (anodic) and 1.73 (cathodic). This pair of peaks can be attributed to the insertion/extraction of a little amount of Na<sup>+</sup>. In the CV curves of NaV<sub>3</sub>O<sub>8</sub>@10% PPy composite, the little peaks of PPy are concealed by the overlap of electrochemical sodium storage in NaV<sub>3</sub>O<sub>8</sub>@10% PPy composite.
